# Supplementary figures and images for: The effect of host community functional traits on plant disease risk varies along an elevational gradient
Source: eLife journal article supplement (doi:10.7554/elife.67340), 2021-05-13

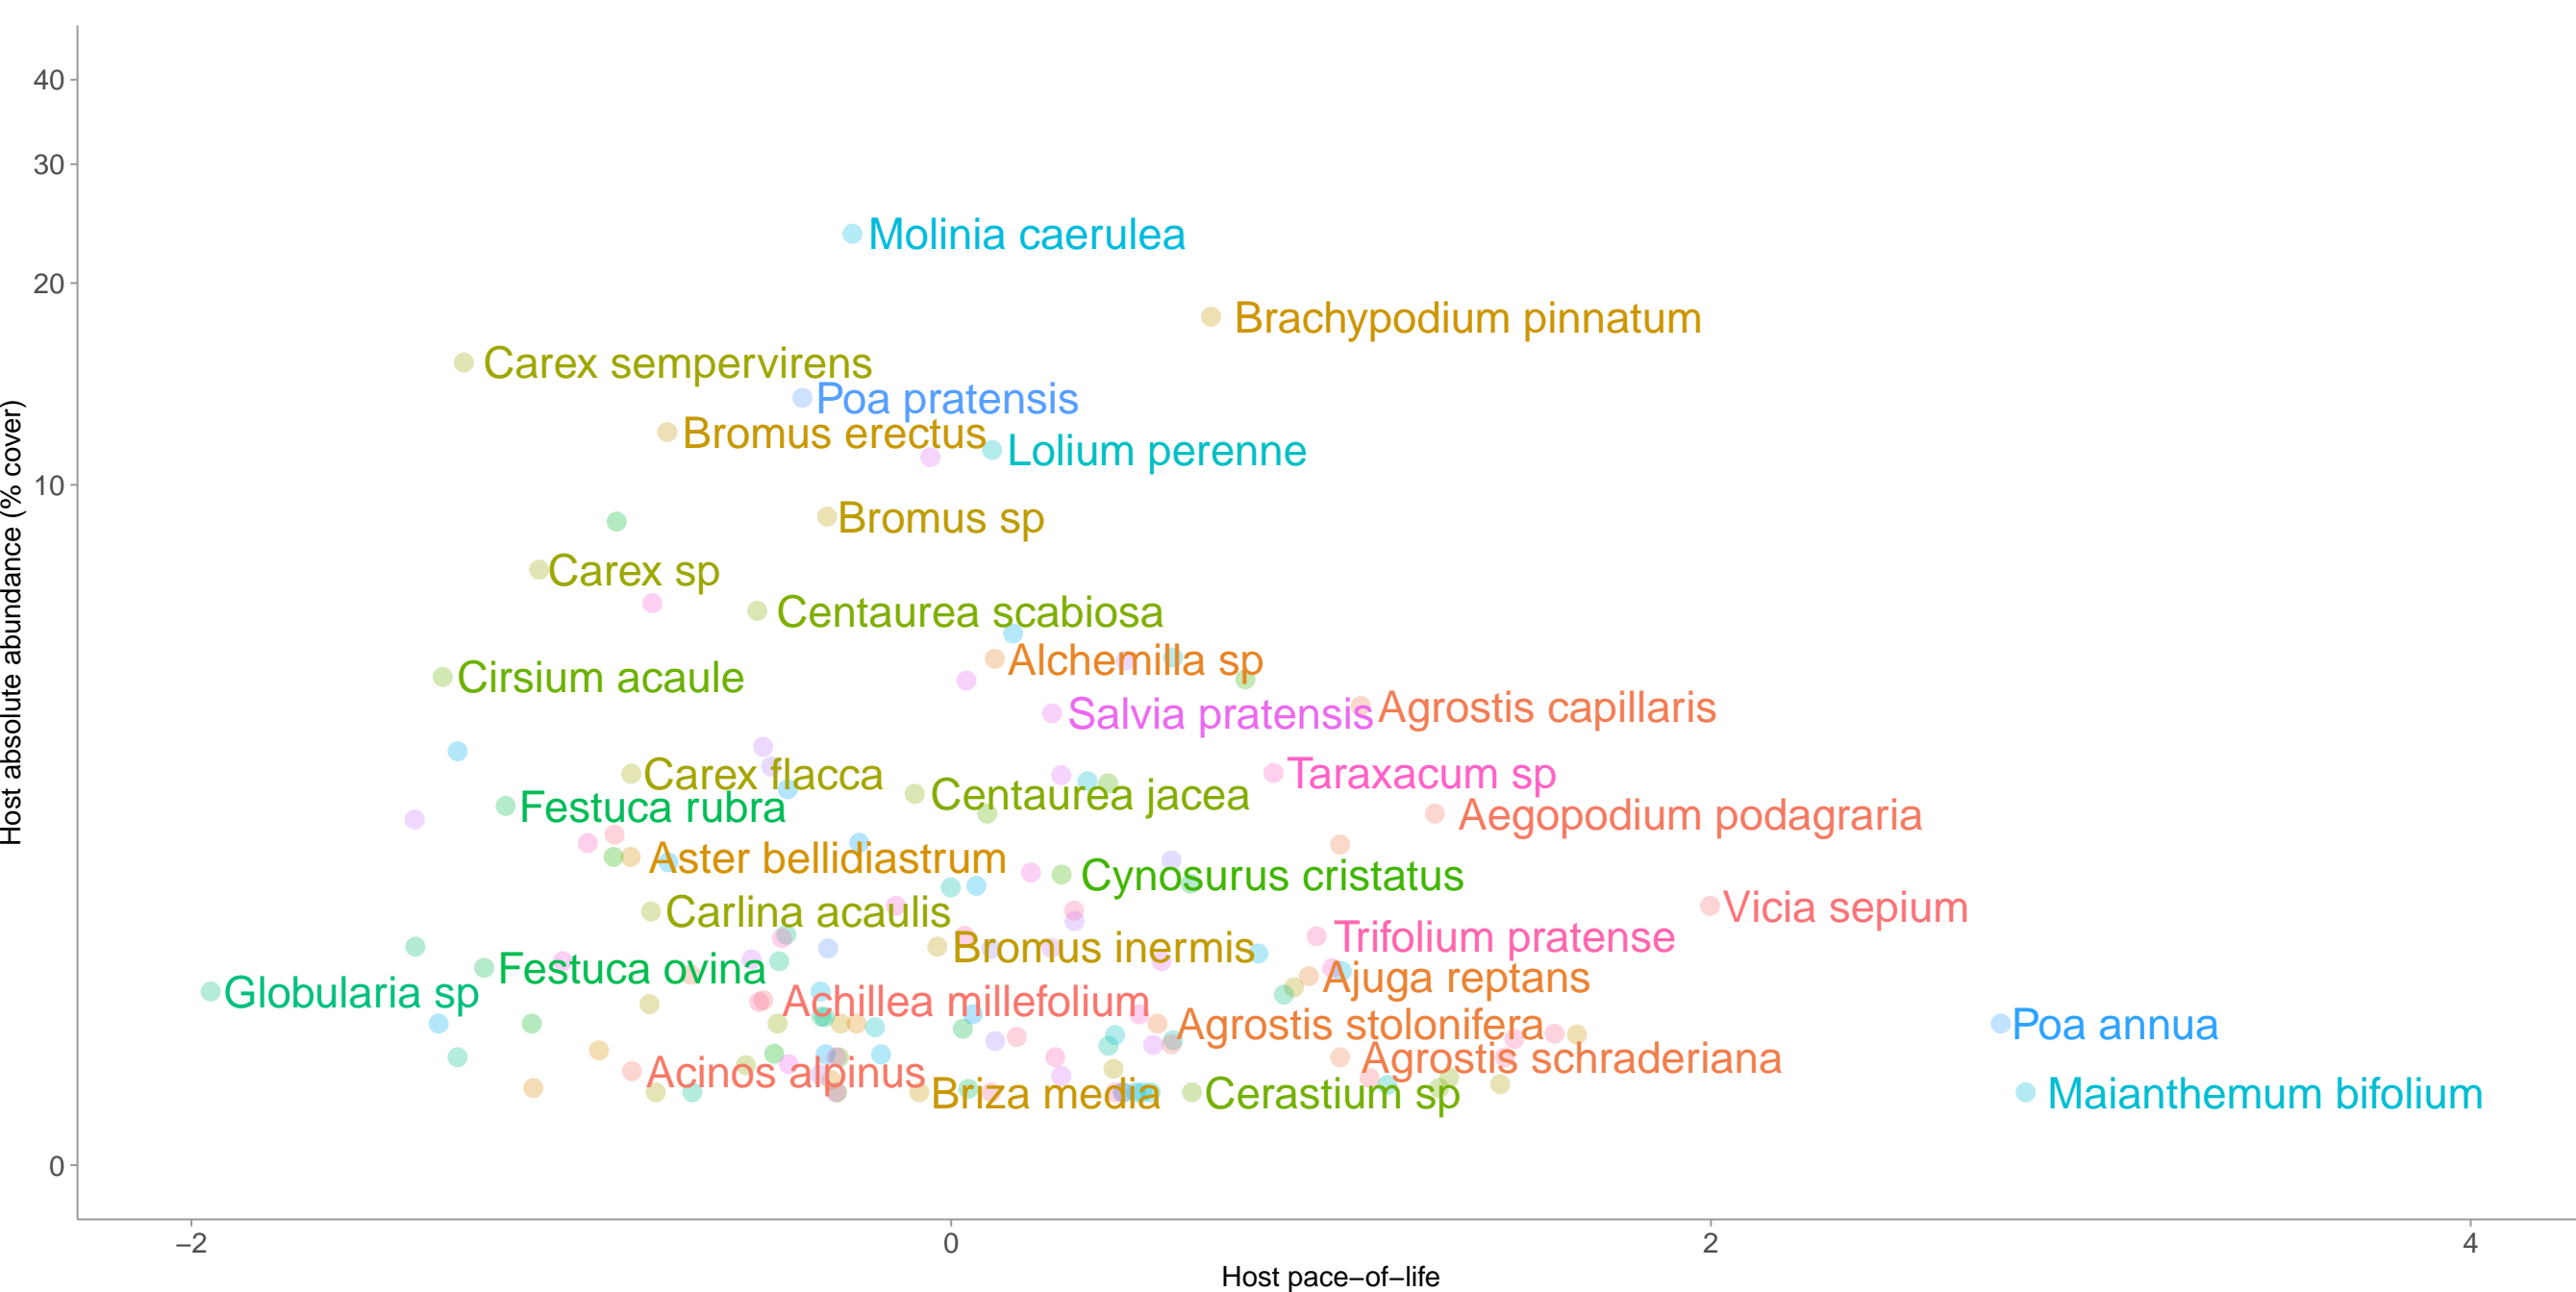

Supplement: supp [file elife_poa_e67340_Figure_3_figure_supplement_1.pdf › elife_poa_e67340_Figure_3_figure_supplement_1.pdf]

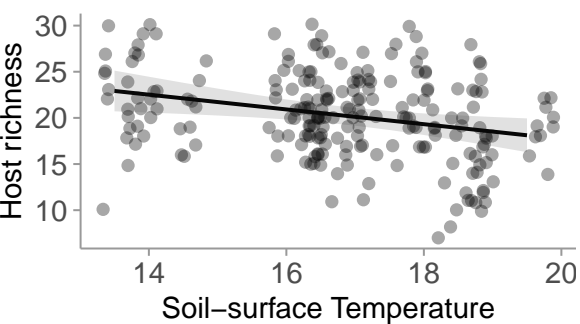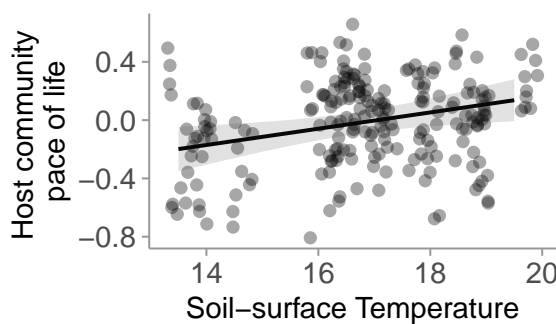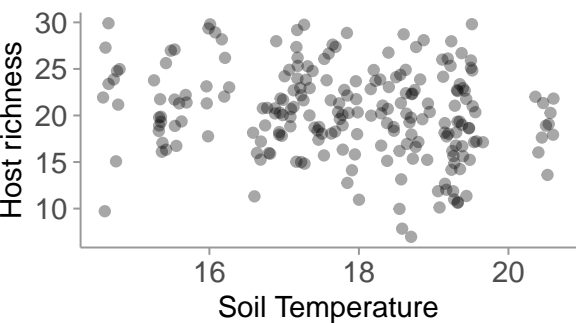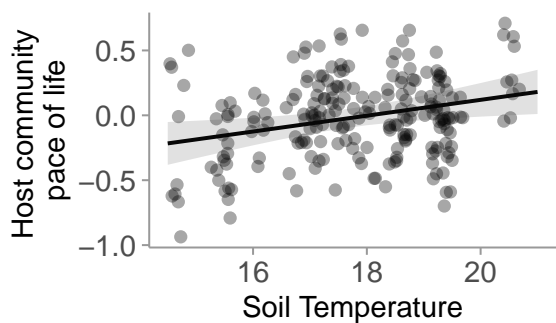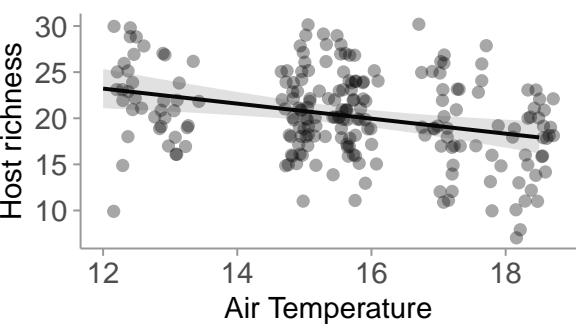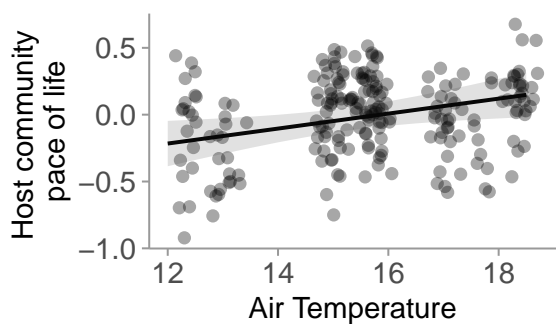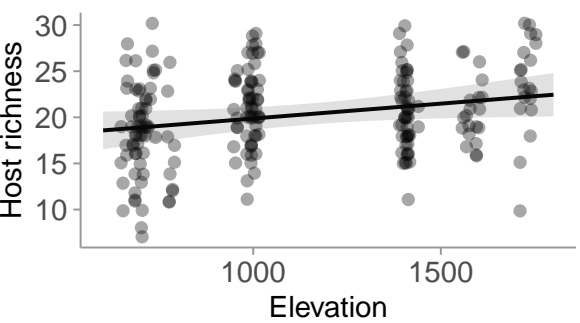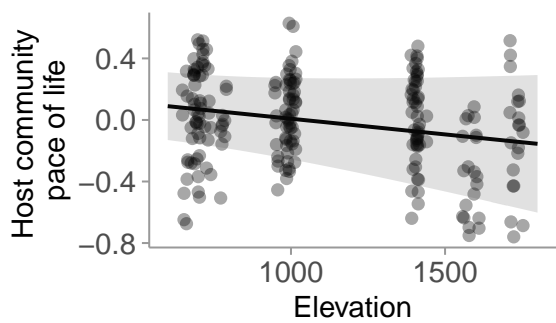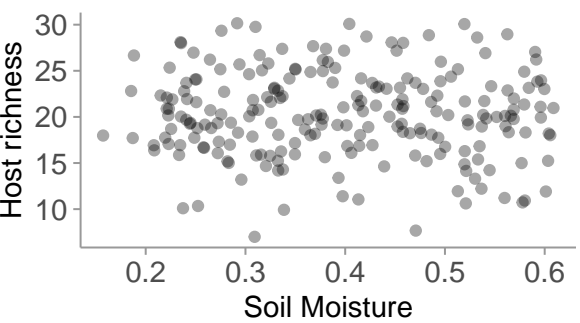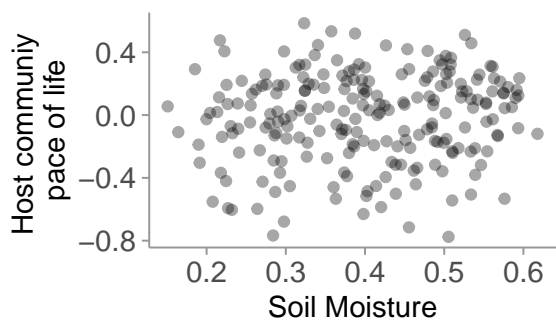

Supplement: supp [file elife_poa_e67340_Figure_3_figure_supplement_2.pdf › elife_poa_e67340_Figure_3_figure_supplement_2.pdf]
